# Supplementary material
Source: Springer Nature journal article supplement (https://www.springermedizin.de/resource/supplementary/12985_2007_404_MOESM7_ESM.pdf/9608006)

**A**

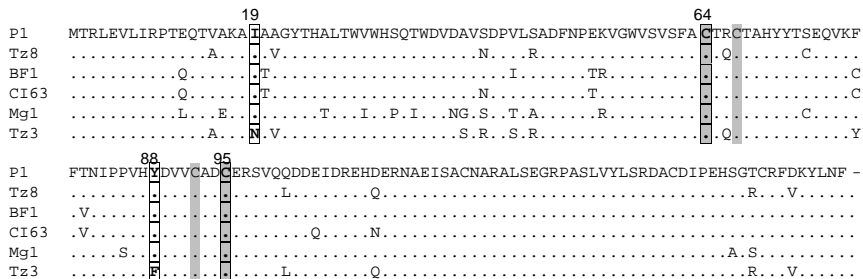

**B**

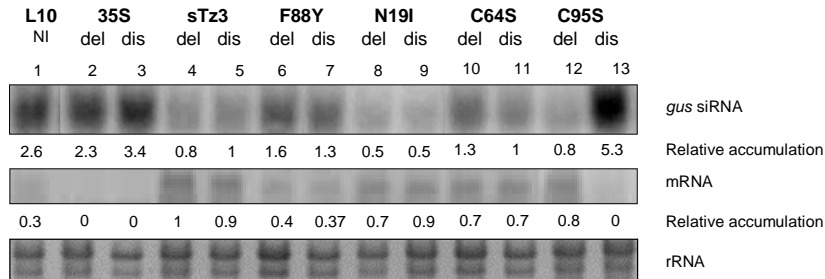

Supplement: MOESM7 [file 9608006]
